# Supplementary material for: The interaction between STING and NCOA4 exacerbates lethal sepsis by orchestrating ferroptosis and inflammatory responses in macrophages
Source: Springer Nature journal article supplement (doi:10.1038/s41419-022-05115-x), 2022-07-28

Figure 2. J

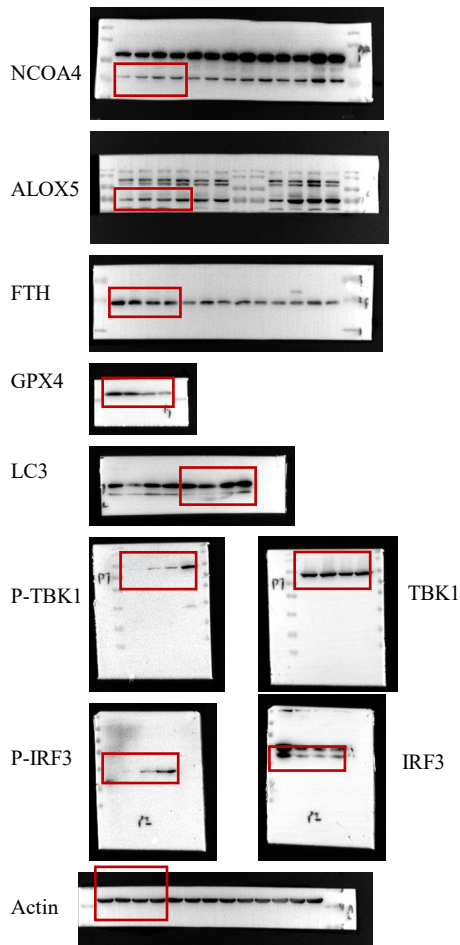

Figure 2. K

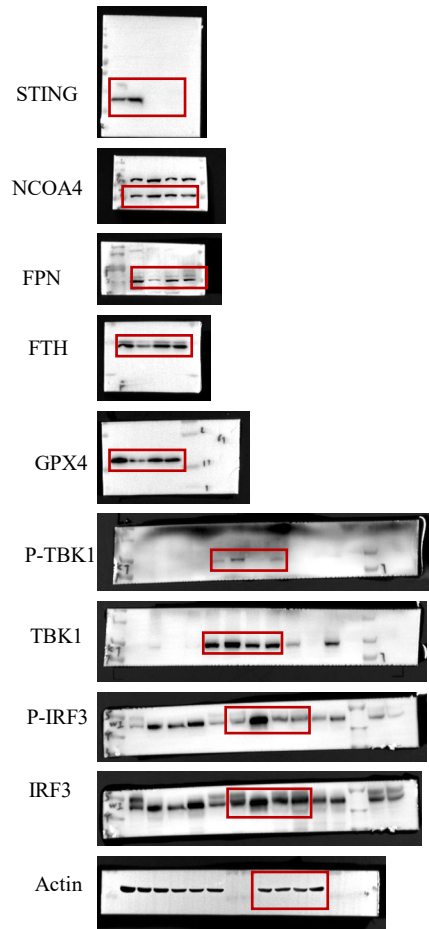

Figure 2. O

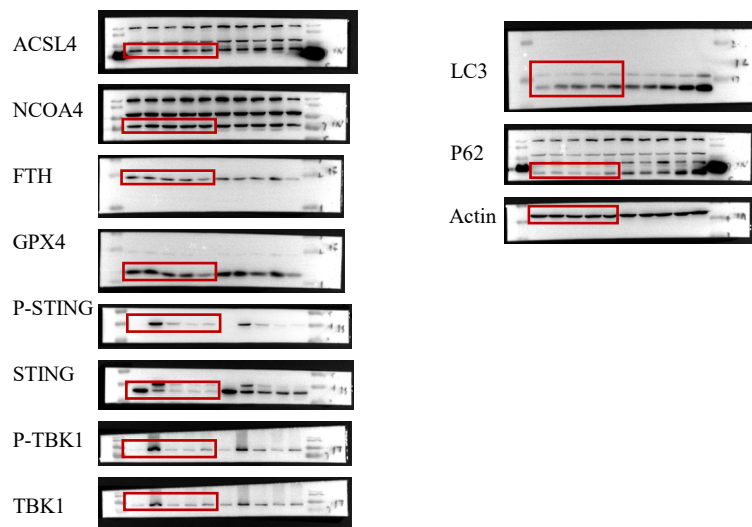

**Figure 3. B**

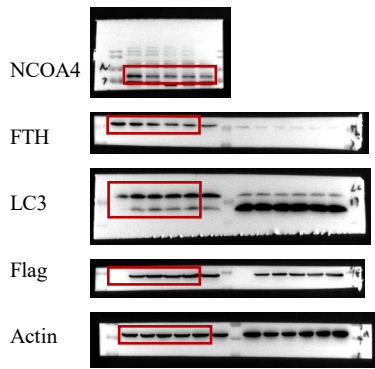

**Figure 3. C**

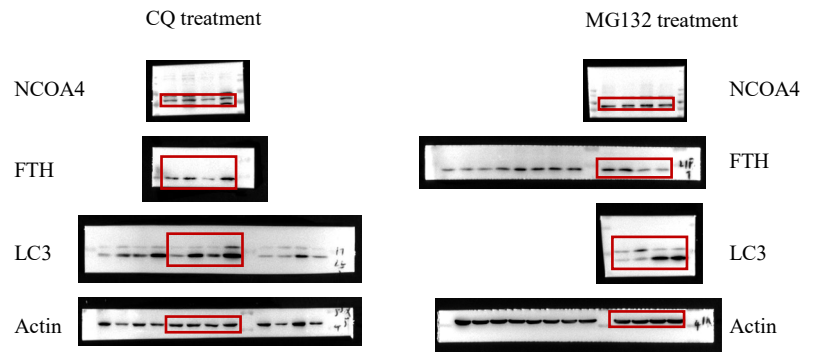

**Figure 3. D**

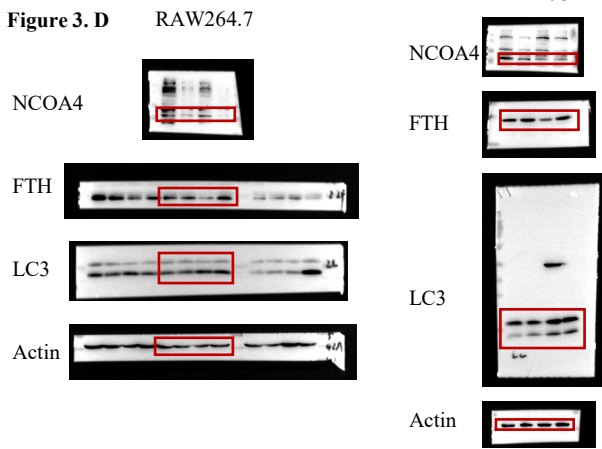

**Figure 3. G**

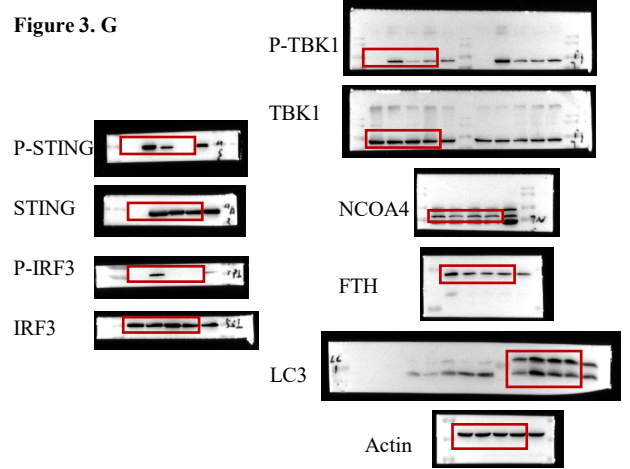

**Figure 3. H**

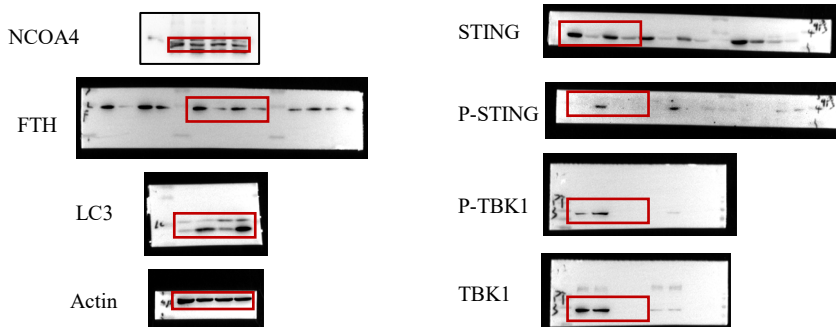

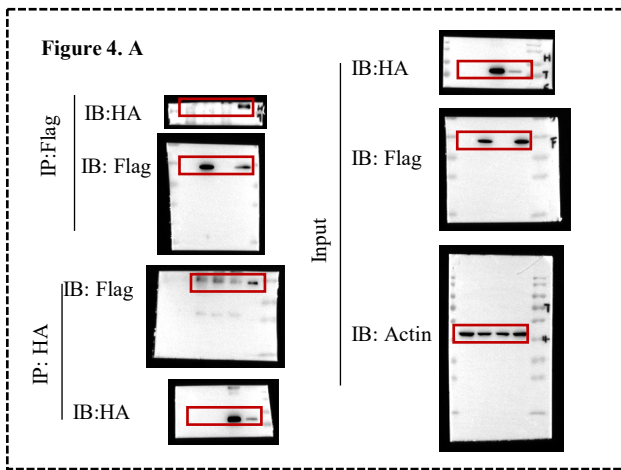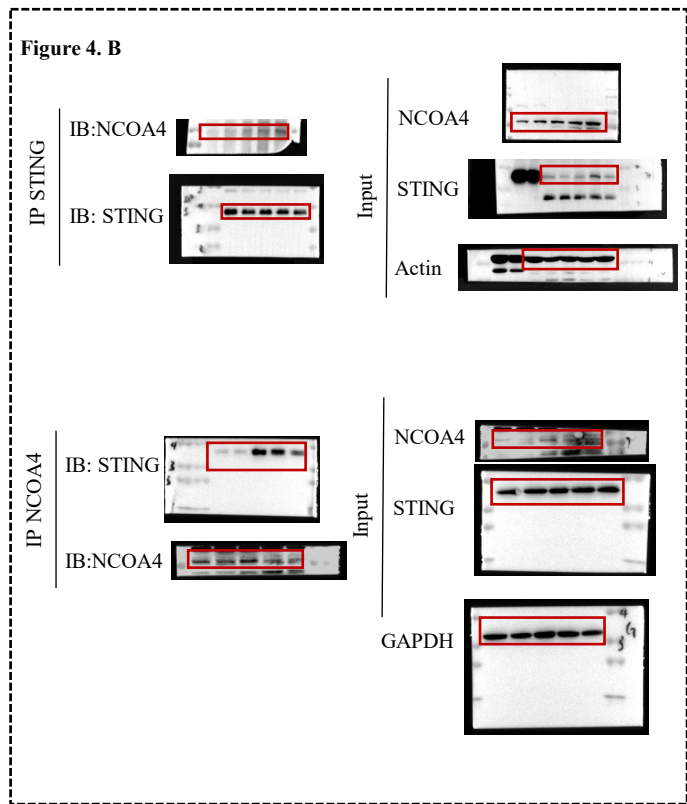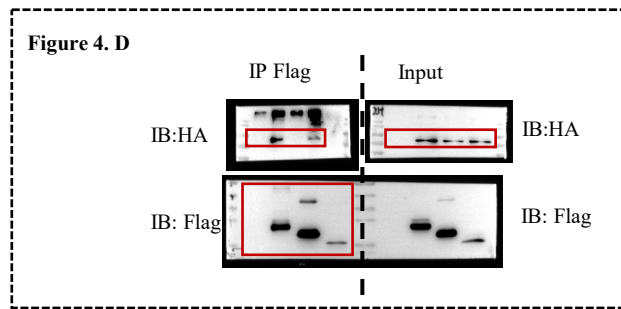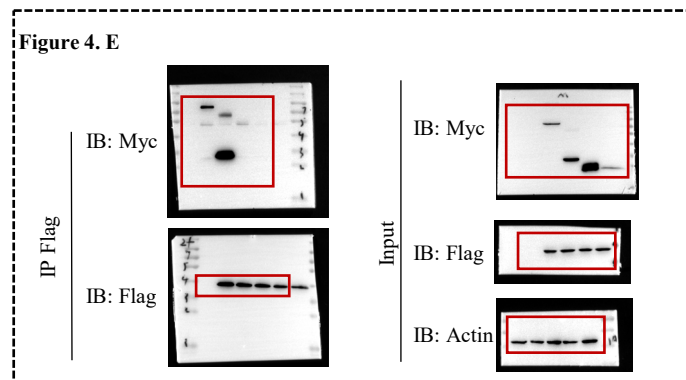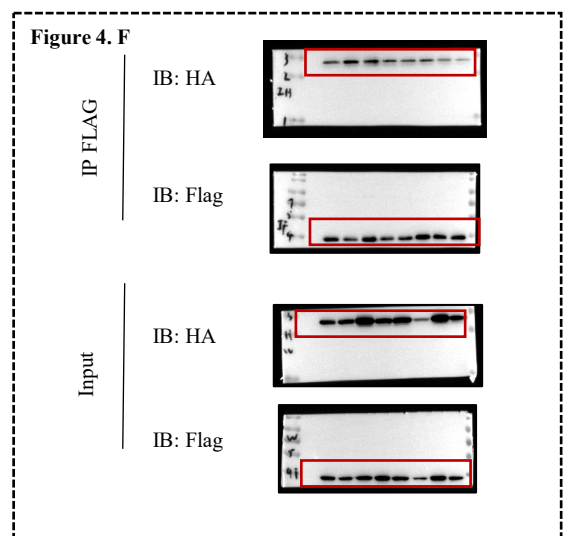

**Figure 5. D**

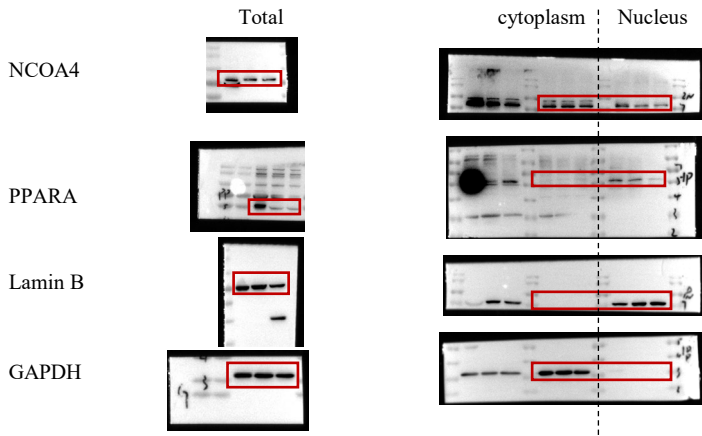

**Figure 5. I**

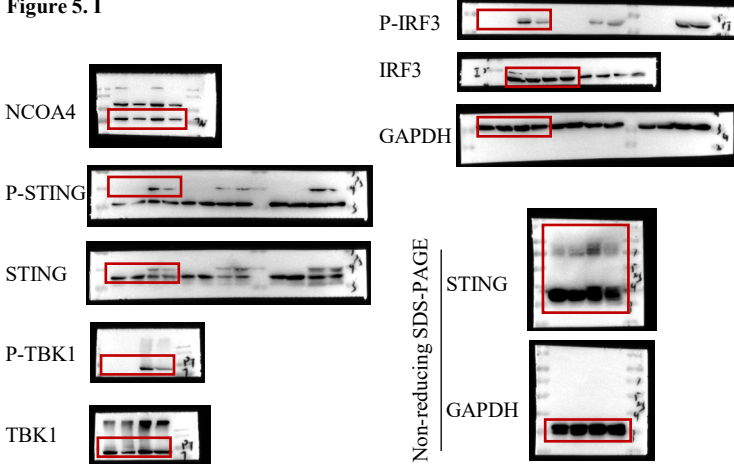

**Figure 5. J**

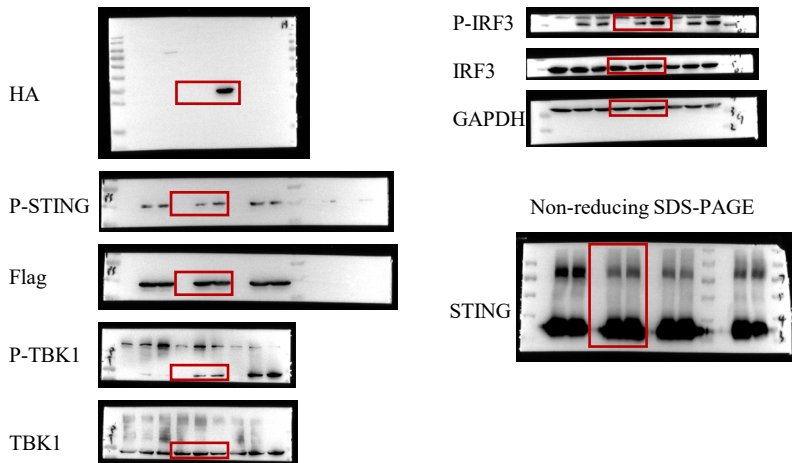



Figure. S3 A

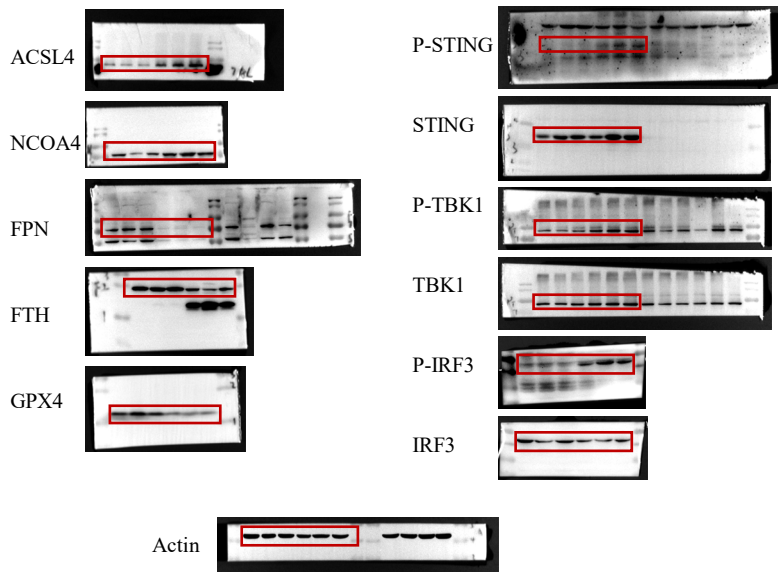

**Fig. S4 b**

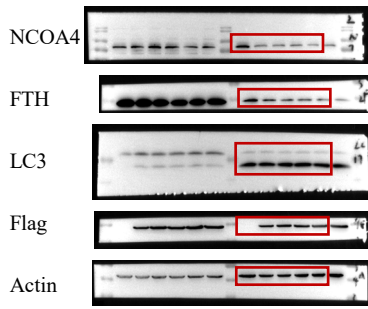

**Fig. S4 c**

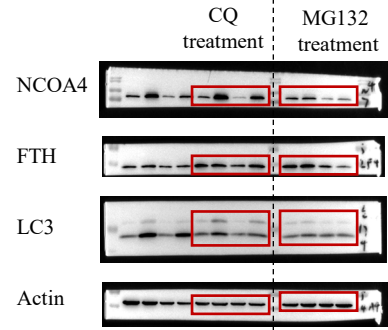

**Fig. S4 d**

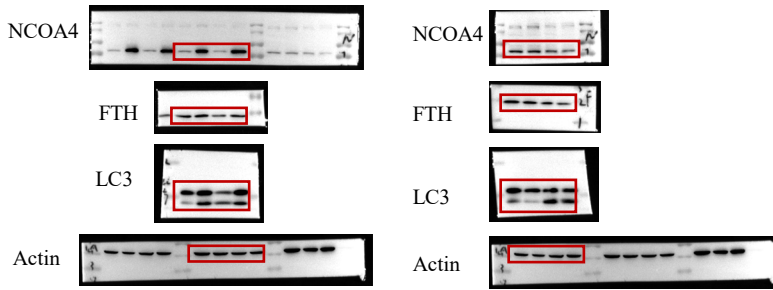

**Fig. S4 f**

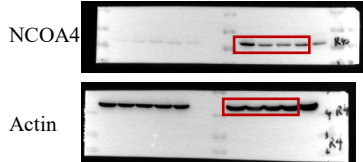

**Fig. S4 g**

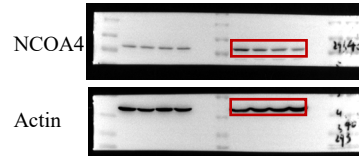

Figure S5 a

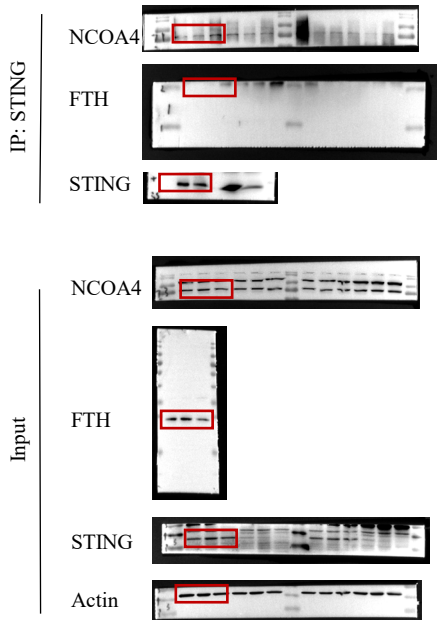

Figure S5. E

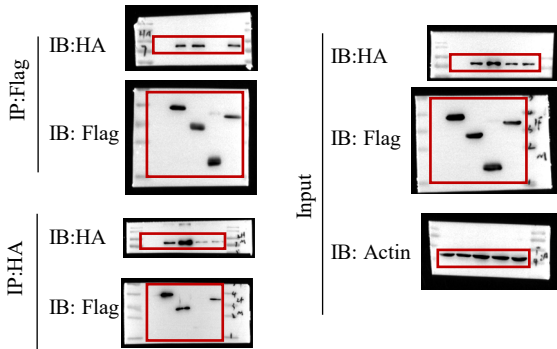

Supplement: MOESM3 [file 41419_2022_5115_MOESM3_ESM.pdf]
